# Supplementary material for: Neurotoxicity in Marine Invertebrates: An Update
Source: PubMed Central journal article supplement (PMC7922589; doi:10.3390/biology10020161), 2021-02-18
Supplement: biology-10-00161-s001.pdf [file biology-10-00161-s001.pdf]

**Supplementary Table S1.** Effects of pesticides to aquatic marine invertebrates.

| Marine organism                                                                                                                                                                  | Pesticide (class) <sup>1</sup>                                                | Exposure                               |                       | Toxic/Neurotoxic effects                                                         | Ref.                            |
|----------------------------------------------------------------------------------------------------------------------------------------------------------------------------------|-------------------------------------------------------------------------------|----------------------------------------|-----------------------|----------------------------------------------------------------------------------|---------------------------------|
|                                                                                                                                                                                  |                                                                               | Dose                                   | Time (h) <sup>2</sup> |                                                                                  |                                 |
| <b><u>Echinoderms</u></b>                                                                                                                                                        |                                                                               |                                        |                       |                                                                                  |                                 |
| <i>H. pulcherrimus</i>                                                                                                                                                           | MCP (OP)                                                                      | 0.01, 0.1, 1 mg/L                      | 24, 36, 48h           | ACh, DA, 5-HT metabolism disruption                                              | Zhang 2017                      |
|                                                                                                                                                                                  | MCP (OP)                                                                      | 0.01, 0.1, 1 mg/L                      | 12-48h                | HpNetrin/neogenin expression affected                                            | Zhang 2017                      |
|                                                                                                                                                                                  | MCP (OP)                                                                      | 5, 10, 30 µg/mL                        | 30, 36, 48, 53h       | 5-HT-hpr decreased expression, no serotonergic axons, swimming activity affected | Yao 2010                        |
| <i>S. purpuratus</i> ,<br><i>S. drobachiensis</i><br><i>L. variegatus</i> ,<br><i>S. drobachiensis</i> ,<br><i>S. granularis</i> ,<br><i>D. excentricus</i><br><i>P. lividus</i> | CPS (OP)                                                                      | 1-160 µM                               | 20-30h                | Generalized dismorphology                                                        | Buznikov 2001;<br>Buznikov 2007 |
|                                                                                                                                                                                  | CPS (OP)                                                                      | 10 <sup>-4</sup> to 10 <sup>-8</sup> M | 24h                   | Signs of nerve damages                                                           | Amaroli 2013                    |
|                                                                                                                                                                                  | Basudin (OP)<br>Diazinon (OP)<br>Carbaryl (CA)<br>Pirimicarb (CA)             | 10 <sup>-3</sup> to 10 <sup>-7</sup> M | Up to 30h             | Strong AChE activity inhibition                                                  | Pesando 2003                    |
| <b><u>Molluscs</u></b>                                                                                                                                                           |                                                                               |                                        |                       |                                                                                  |                                 |
| <i>R. philippinurum</i><br><i>C. gigas</i>                                                                                                                                       | DDVP (OP)                                                                     | 0.1, 1 mg/L                            | 6h + 42h depuration   | Adductor muscles paralysis                                                       | Le Bris 1995                    |
| <i>C. gigas</i>                                                                                                                                                                  | DDVP (OP)<br>Carbofuran (CA)<br>Oxamyl (OP)<br>Lindane (OC)                   | 0.1-200 µM                             | 96h                   | AChE activity inhibition<br>Reduced AChE activity                                | Anguiano 2010                   |
|                                                                                                                                                                                  | Paraoxon (OP)<br>DFP (OP)<br>Eserine (CA)<br>Carbaryl (CA)<br>Carbofuran (CA) | 1-2.5 µM                               | 12 days               | Slight decreased AChE activity                                                   |                                 |
|                                                                                                                                                                                  | Paraoxon (OP)<br>DFP (OP)<br>Eserine (CA)<br>Carbaryl (CA)<br>Carbofuran (CA) | -                                      | -                     | Soluble AChE insensitive to OC and CA pesticides                                 | Bocquene 1997                   |
| <i>R. decussatus</i>                                                                                                                                                             | DDVP (OP)                                                                     | 0.05, 0.25 mg/L                        | 2 days                | Oxidative stress<br>Reduced AChE activity                                        | El Ayari 2020                   |
| <i>M. edulis</i>                                                                                                                                                                 | DDVP (OP)                                                                     | 1-10000 µg/L gradient                  | 24h                   | Increased mortality, reduced AChE activity                                       | McHenry 1997                    |
|                                                                                                                                                                                  | AZ (OP)                                                                       | 0.1 mg/L                               | 1h, 24h               | Immune system affected, decreased AChE activity                                  | Canty 2007                      |
|                                                                                                                                                                                  | Paraoxon (OP)<br>DFP (OP)<br>CPS (OP)<br>Eserine (CA)<br>CPS (OP)<br>CPS (OP) | 0.05-1 mM                              | 24h                   | AChE activity inhibition                                                         | Galloway 2002                   |
|                                                                                                                                                                                  | CPS (OP)<br>CPS (OP)                                                          | 0.003-0.03 mg/L<br>0.4-30 mg/L         | 24, 48, 96h           | Immunotoxic effects, decreased AChE activity                                     | Rickwood and Galloway 2004      |
| <i>Aplysia</i>                                                                                                                                                                   | Paraoxon (OP)                                                                 | 5 mM                                   | 36h                   | Reduced neurite growth, neural death                                             | Srivatsan 1999                  |
| <i>A. californica</i>                                                                                                                                                            | Paraoxon (OP)                                                                 | 5 mM                                   | 36h                   | Chlorid conductance inhibition                                                   | Filbert 1992                    |
| <i>A. juliana</i>                                                                                                                                                                | MP (OP)                                                                       | 1, 2 mg/L                              | 7, 14 days            | Reduced AChE activity, increased antioxidant enzymes activities                  | Chen 2014                       |

|                            |                                                                                                                                                                     |                                         |              |                                                                     |                                |
|----------------------------|---------------------------------------------------------------------------------------------------------------------------------------------------------------------|-----------------------------------------|--------------|---------------------------------------------------------------------|--------------------------------|
| <i>P. viridis</i>          | ATZ (OC)                                                                                                                                                            | 30-3000 ng/L                            | 7 days       | Immune functions alterations, hemolymph AChE activity inhibition    | Juhel 2017                     |
| <b><u>Crustaceans</u></b>  |                                                                                                                                                                     |                                         |              |                                                                     |                                |
| <i>H. gammarus</i>         | DDVP (OP)                                                                                                                                                           | 0.01-100 µg/L<br>0.1-50 µg/L            | 24h<br>6h    | AChE activity inhibition                                            | McHenery 1991<br>McHenery 1997 |
| <i>H. nilssoni</i>         | DDVP (OP)                                                                                                                                                           | 5-320 µg/L                              | 96h          | Reduced AChE activity                                               | Murison 1997                   |
| <i>L. vannamei</i>         | Methamidophos (OP)                                                                                                                                                  | 0.66-1.35 mg/L                          | 24h          | Eye ChE activity inhibition                                         | Garcia-de la Parra 2005        |
|                            | CPS (OP)                                                                                                                                                            | 0.7, 1.3 µg/L                           | 4 days       | Antioxidant enzymes activities changes; AChE activity inhibition    | Duarte-Restrepo 2008           |
| <i>P. serratus</i>         | CPS-oxon (OP)<br>Malaoxon (OP)<br>TRZ (OP)<br>DDVP (OP)<br>Paraoxone (OP)<br>Serine sulphate (CA)<br>Carbofuran (CA)<br>Propoxur (CA)<br>Carbaryl (CA)<br>DDVP (OP) | various<br>0.057-0.452 µM               | -<br>24h     | Eye ChE enzyme responsiveness<br>Mortality, ChE activity inhibition | Frasco 2006<br>Frasco 2008     |
|                            | Fenitrothion (OP)                                                                                                                                                   | 39-625 ng/L                             | 96h          | Swimming velocity alteration, AChE activity inhibition              | Oliveira 2013                  |
|                            | Deltamethrin (PR)                                                                                                                                                   | 0.6-313 ng/L                            | 96h          | Antioxidant enzymes activities changes, Eye AChE activity increase  | Oliveira 2012                  |
| <i>H. americanus</i>       | AZ (OP)                                                                                                                                                             | 61 ng/L                                 | 10 days      | Stress/hypoxia changes, oxidative damage, ChE activity inhibition   | Couillard 2015                 |
| <i>L. salmonis</i>         | AZ (OP)                                                                                                                                                             | various                                 | -            | AChE activity inhibition                                            | Fallang 2004                   |
| <i>A. franciscana</i>      | CPS (OP)                                                                                                                                                            | 0.1, 1, 5 µg/L                          | various days | AChE activity inhibition                                            | Varò 2015                      |
| <i>A. parthenogenetica</i> | CPS (OP)                                                                                                                                                            | 10 <sup>-11</sup> to 10 <sup>-5</sup> M | 72, 96, 192h | Larval survival changes, decreased ChE activity                     | Gambarella 2018                |
| <i>A. salina</i>           | Diazinon (OP)<br>Carbaryl (CA)                                                                                                                                      |                                         |              |                                                                     |                                |
| <i>T. japonicas</i>        | CPS (OP)<br>Lindane (OC)                                                                                                                                            | various                                 | 24h          | AChE activity inhibition                                            | Lee 2105                       |
| <i>P. monodon</i>          | Deltamethrin (PR)                                                                                                                                                   | 0.1 µg/L                                | 4 days       | Oxidative stress changes, AChE activity reduction                   | Thi Tu 2012                    |

<sup>1</sup> Pesticides class: OC, organochlorine; OP, organophosphate; CA, carbamate; PR, pyrethroid.

<sup>2</sup> hours of exposure.

5-HT-hpr, serotonin receptor; ACh, acetylcholine; DA, dopamine; 5-HT, serotonin.

ATZ, atrazine; AZ, azamethiphos; CPS, chlorpyrifos; DDVP, dichlorvos; DFP, diisopropylfluorophosphate; MCP, monocrotophos; MP, methyl parathion; TRZ, triazophos-oxon.

**Supplementary Table S2.** Effects of microplastics (MPs) to aquatic marine invertebrates.

| Marine organism                  | MP type and size                         | Exposure                                                                           |                                                             | Toxic effects                                                                                                                                                  | Neurotoxic effects                            | Ref.           |
|----------------------------------|------------------------------------------|------------------------------------------------------------------------------------|-------------------------------------------------------------|----------------------------------------------------------------------------------------------------------------------------------------------------------------|-----------------------------------------------|----------------|
|                                  |                                          | Dose                                                                               | Method and Time (h) <sup>1</sup>                            |                                                                                                                                                                |                                               |                |
| <b><u>Molluscs</u></b>           |                                          |                                                                                    |                                                             |                                                                                                                                                                |                                               |                |
| <i>Mytilus galloprovincialis</i> | PE and PS (100 µm)                       | 1.5 g/L<br>+/- 50 µg/L of PYR                                                      | Water<br>7 days                                             | Primary MP accumulation in DG<br>MP presence in G and H<br>DNA damage<br>No oxidative stress<br>Alteration in gene expression (immunity, lysosomal metabolism) | Reduced AChE activity in G,<br>no in H        | Avio 2015      |
|                                  | PS (0,11 µm)                             | 0.005, 0.05, 0.5, 5 and 50 mg/L<br>6.3 µg/L Cbz;<br>PS + Cbz (0.05 mg/L + 6.3 g/L) | Water<br>96h                                                | Alteration in gene expression in G (biotransformation and innate immunity) and in DG (cell stress)<br>DNA damage                                               | Reduced ChE activity in H                     | Brandts 2018   |
| <i>Scrobicularia plana</i>       | PS (20 µm)                               | 1 mg/L                                                                             | Water, 21 days<br>(14 days exposure + 7 days of depuration) | Primary MP accumulation in G<br>MP presence also in and DG<br>Oxidative stress in DG<br>Increase of antioxidant capacity in G                                  | Reduced AChE activity in G                    | Ribeiro 2017   |
|                                  | LDPE (11–13 µm)                          | 1 mg /L<br>+/- 82 ng/g BP-3                                                        | Water-sediment,<br>14 days                                  | Oxidative stress in DG (only LDPE+BP3)<br>Oxidative stress and increase of antioxidant activities in G                                                         | No AChE activity inhibition in G              | O'Donovan 2020 |
| <i>Donax trunculus</i>           | Mixture PP/PE, ratio 1:1<br>(100-400 nm) | 0.06 g/Kg                                                                          | Sand<br>15 days                                             | Primary MP accumulation in G<br>No MP presence in F<br>Oxidative stress                                                                                        | Reduced AChE activity in G and DG, no in F    | Tlili 2020     |
| <i>C. Fluminea</i>               | PS-NP fl (80 nm)                         | 0.1, 1 and 5 mg/L                                                                  | Water<br>96h                                                | Primary MP accumulation in G and in VM<br>Oxidative stress and increase of antioxidant activities<br>Intestinal inflammation                                   | Reduced AChE activity<br>In VM, no in G       | Li 2020        |
| <i>Tegillarca granosa</i>        | PS-MP<br>(490 ± 11 nm)                   | 1 mg /L<br>+/- 10 and 100 ng/L BPA                                                 | Water<br>14 days                                            | Changes in the hematic parameters<br>Immunotoxicity                                                                                                            | Increase of neurotransmitters (GABA, DA, ACh) | Yu Tang 2020   |

---

**Crustaceans**

|                                                                 |                            |                              |                          |                                                                                                                                                                             |                                              |                     |
|-----------------------------------------------------------------|----------------------------|------------------------------|--------------------------|-----------------------------------------------------------------------------------------------------------------------------------------------------------------------------|----------------------------------------------|---------------------|
| <i>A. Amphitrite (shrimp)</i><br><i>A. fransiscana (larvae)</i> | PS (0.1 µm)                | 0.001, 0.01, 0.1, 1, 10 mg/L | Water<br>24 and 48h      | MP accumulation in intestine<br>Swimming alteration<br>Oxidative stress                                                                                                     | Partial AChE and PChE<br>activity inhibition | Gambardella<br>2017 |
| <i>A. fransiscana (shrimp)</i>                                  | PS-NH <sub>2</sub> (50 nm) | 0.1-10mg/L                   | Water<br>48h and 14 days | Alteration in growth and<br>development (48h)<br>Mortality (14 days)<br>Oxidative stress<br>Alteration in gene expression (cell<br><u>stress, development and molting</u> ) | Reduced AChE activity                        | Varò 2019           |

<sup>1</sup> hours of exposure.

Invertebrate tissues: DG, digestive gland; F, flesh; G, gills; H, hemolymph; VM, visceral mass.

ACh, acetylcholine; Cbz, carbamazepine; BP-3, oxybenzone; BPA, bisphenol A; DA, dopamine; GABA, g-aminobutyric acid; LDPE, low-density polyethylene; NP fl, fluorescent nanoparticles; PE, Polyethylene; PP, polypropylene; PS, polystyrene; PS-NH<sub>2</sub>, amino-modified polystyrene; PYR, pyrene.
